# Supplementary material
Source: PubMed Central journal article supplement (PMC4971411)
Supplement: Supp_Table1.pdf [file Supp_Table1.pdf]

## Supplementary Data

SUPPLEMENTARY TABLE S1. MAJOR HISTOCOMPATIBILITY COMPLEX CLASS I TYPING RESULTS

| <i>ID</i> | <i>HIV status</i> | <i>HLA-A</i> |        | <i>HLA-B</i> |                  |
|-----------|-------------------|--------------|--------|--------------|------------------|
| 7164      | EC                | A*0101       | A*2501 | B*1801       | B*5701           |
| 7176      | EC                | A*3101       | A*6802 | B*1801       | B*5703           |
| 7178      | EC                | A*2402       | A*7401 | B*0702       | B*4505 or B*5001 |
| 7179      | EC                | A*2402       | A*2902 | B*4403       | B*5701           |
| 7180      | EC                | A*24         | A*74   | B*07         | B*57             |
| 7183      | EC                | A*0201       | A*0301 | B*0702       | B*3501           |
| 7187      | EC                | A*0101       | A*0101 | B*0801       | B*0801           |
| 7191      | EC                | A*01         | A*32   | B*35         | B*73             |
| 9038      | EC                | A*25         | A*32   | B*13         | B*27             |
| 7190      | VC                | A*24         | A*31   | B*27         | B*44             |
| 7109      | VC                | A*0301       | A*0301 | B*1402       | B*5703           |
| 9012      | NC                | A*0101       | A*0201 | B*0702       | B*0702           |
| 9016      | NC                | A*02         | A*03   | B*07         | B*15             |
| 9036      | NC                | A*02         | A*29   | B*51         | B*58             |
| 9040      | NC                | A*03         | A*11   | B*35         | B*51 or B*53     |
| 4141      | NC                | A*01         | A*02   | B*40         | B*57             |
| 7193      | NC                | A*01         | A*02   | B*08         | B*27             |

Results of low-resolution HLA typing are shown to two digits; results of high-resolution typing are shown to four digits.  
 EC, elite controllers; NC, noncontrollers; VC, viremic controllers.
